# Supplementary material for: Exosome-Derived microRNAs from Mouthrinse Have the Potential to Be Novel Biomarkers for Sjögren Syndrome
Source: MDPI journal article supplement (doi:10.3390/jpm12091483), 2022-09-10
Supplement: s1 [file s1]

Supplementary Material

# Mouthrinse Is a Novel Non-Invasive Sampling Method for the Diagnosis and Screening of Sjögren Syndrome

Kouta Yamashiro <sup>1</sup>, Tomofumi Hamada <sup>1,2</sup>, Kazuki Mori <sup>1</sup>, Keitaro Nishi <sup>1</sup>, Maya Nakamura <sup>1</sup>, Mahiro Beppu <sup>1</sup>, Akihiko Tanaka <sup>1</sup>, Hiroshi Hijioka <sup>1</sup>, Yoshiaki Kamikawa <sup>1</sup> and Tsuyoshi Sugiura <sup>1</sup>

<sup>1</sup> Department of Maxillofacial Diagnostic and Surgical Science, Field of Oral and Maxillofacial Rehabilitation, Graduate School of Medical and Dental Science, Kagoshima University, Kagoshima, Japan

<sup>2</sup> Department of Oral & Maxillofacial Surgery, Hakuai Medical Cooperation, Sagara Hospital, Kagoshima, Japan

\* Correspondence: [sugiura@dent.kagoshima-u.ac.jp](mailto:sugiura@dent.kagoshima-u.ac.jp)

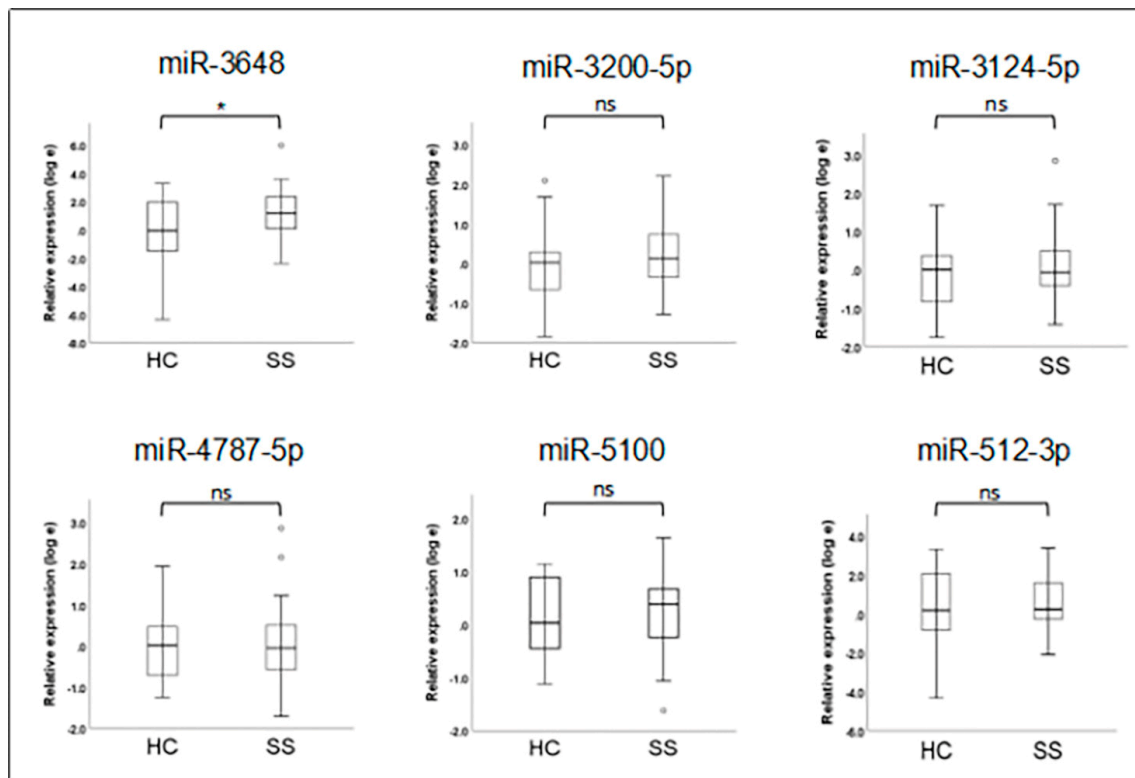

**Supplementary Figure S1.** Comparison of normalized signal intensity of six microRNAs between patients with Sjögren's syndrome (SS) and controls (HC). There were significant differences in signal intensity for miR-3648 ( $p < 0.05$ , t tests). Signal intensity did not significantly differ for the other five miRNAs. \*:  $p < 0.05$ , ns: no significant difference.

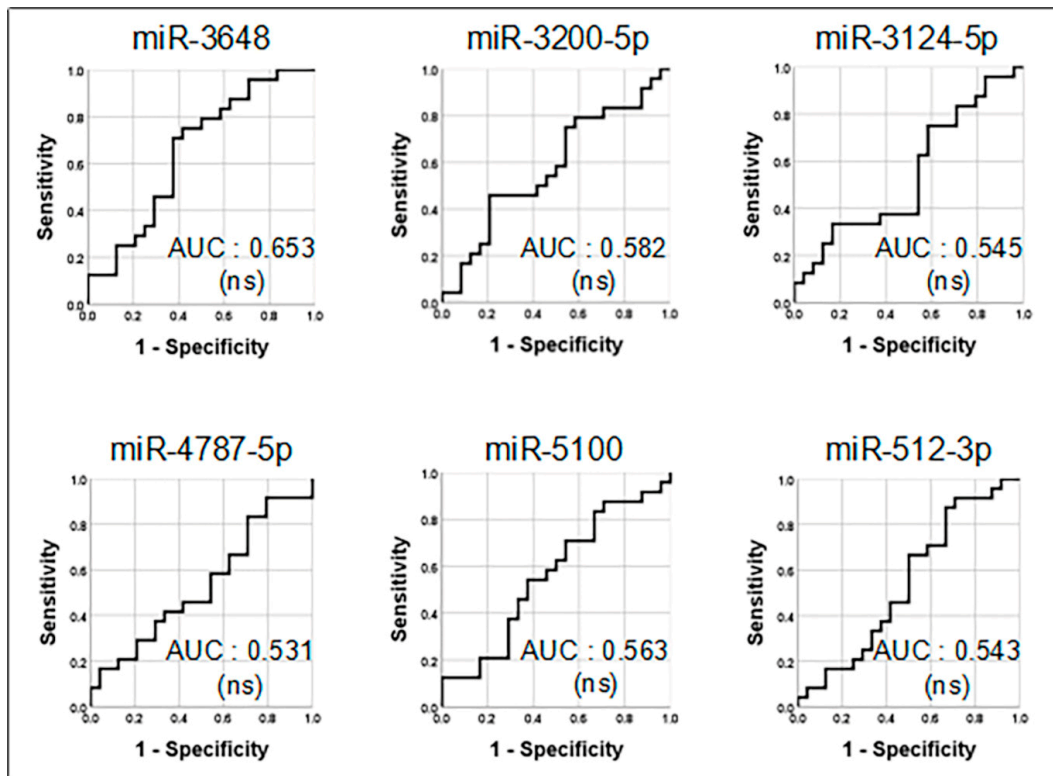

**Supplementary Figure S2.** AUC of six microRNAs. The six microRNA's area under ROC curves (AUC) did not significantly discriminate Sjögren's syndrome (SS) patients from controls. ns: no significant difference.
